# Supplementary material for: Nitrogen-intercalated Pd metallene nanoribbons with optimized electronic structure for oxygen reduction catalysis
Source: Royal Society of Chemistry journal article supplement (doi:10.1039/d3cc03181k), 2023-01-01
Supplement: d3cc03181k1.pdf [file d3cc03181k1.pdf]

Electronic Supplementary Information for

# Nitrogen intercalated Pd metallene nanoribbons with optimized electronic structure for oxygen reduction catalysis

*Hongjing Wang, Yunju Li, Songliang Liu\*, Hongjie Yu, Kai Deng, Ziqiang Wang, You Xu and Liang Wang\**

State Key Laboratory Breeding Base of Green-Chemical Synthesis Technology, College of Chemical Engineering, Zhejiang University of Technology, Hangzhou 310014, P. R. China.

**Corresponding authors**

\*E-mails: [songliangliu@zjut.edu.cn](mailto:songliangliu@zjut.edu.cn), [wangliang@zjut.edu.cn](mailto:wangliang@zjut.edu.cn)

## **Experimental Section**

### **Chemicals and Materials**

Sodium tetrachloropalladate ( $\text{Na}_2\text{PdCl}_4$ ), ethylenediamine (EN), L-ascorbic acid (AA), polyvinylpyrrolidone (PVP,  $M_w = 40000$ ), molybdenum hexacarbonyl ( $\text{Mo}(\text{CO})_6$ ), diiron nonacarbonyl ( $\text{Fe}_2(\text{CO})_9$ ), dicobalt octacarbonyl ( $\text{Co}_2(\text{CO})_8$ ), tungsten hexacarbonyl ( $\text{W}(\text{CO})_6$ ), urea, Nafion (5 wt%) and PVP ( $M_w = 58000$ ) were supplied by Aladdin. Pt/C (20 wt%) was provided by Alfa Aesar.

### **Synthesis of Pd MNRs**

The synthesis of Pd MNRs was based on a previous report with minor modification.<sup>1</sup> First,  $\text{Mo}(\text{CO})_6$  (50 mg), AA (80 mg) and PVP (600 mg,  $M_w = 40000$ ) were dissolved in 2 mL EN by sonication. Subsequently, 0.5 mL  $\text{Na}_2\text{PdCl}_4$  (0.1 M) was dripped in the gained solution and the mixture was held for 8 h at 120 °C in an oil bath. Eventually, Pd MNRs were centrifuged with water, ethanol and acetone.

### **Synthesis of N-Pd MNRs**

The above Pd MNRs (2 mg) were added into a water (6 mL) containing urea (60 mg) and PVP (85 mg,  $M_w = 58000$ ). The resulting mixture was vigorously stirred for 20 min and then transferred to a Teflon-lined stainless-steel autoclave (25 mL). The above mixture was heated for 1 h at 180 °C. At last, the resulting sample was purified by alternating centrifugal washing with water, ethanol and acetone.

### **Materials Characterization**

The microstructure, composition, electronic structure, and crystal information of catalyst were characterized by transmission electron microscopy (TEM, JEOL-2100F) equipped with energy

dispersive X-ray spectroscopy (EDX) system, atomic force microscopy (AFM, Bruker Dimension ICON), X-ray photoelectron spectroscopy (XPS, Thermo ESCALAB 250XI), and X-ray diffraction spectrometer (XRD, PANalytical Empyrean). Inductively coupled plasma optical emission spectrometry (ICP-OES) analysis was performed on Agilent ICPOES730.

### **Electrocatalytic Experiments**

During the electrochemical measurements, all potentials were referred to reversible hydrogen electrode (RHE). The ORR properties were tested on CHI 852D electrochemical analyzer with a three-electrode system consisting of counter electrode (Pt wire), working electrode (rotating disk electrode (RDE, a diameter of 3 mm) with catalyst coating) and reference electrode (Ag/AgCl electrode (KCl saturated)). To prepare catalyst ink, different samples (2 mg) were dispersed in 200  $\mu\text{L}$  of ethanol, 750  $\mu\text{L}$  of  $\text{H}_2\text{O}$  and 50  $\mu\text{L}$  of Nafion solution (0.5 wt %) under ultrasonication. The rotating disk electrode was covered with 2.0  $\mu\text{L}$  catalyst ink. Linear sweep voltammetry (LSV) was recorded with a rotating speed of 1600 rpm at a scan rate of 10  $\text{mV s}^{-1}$  in an  $\text{O}_2$ -saturated 0.1 M KOH solution.

The electron transfer number ( $n$ ) could be estimated from the Koutecky-Levich equation as follows:

$$j^{-1} = j_k^{-1} + j_d^{-1}$$

$$j_d = 0.2nFD^{2/3}\nu^{-1/6}\omega^{1/2} C_{\text{O}_2}$$

In which  $j_d$ ,  $j_k$  and  $j$  stand for limiting diffusion current density, kinetic current density and measured current density, respectively,  $F$  is the Faraday constant ( $96485 \text{ C mol}^{-1}$ ),  $\nu$  is the electrolyte viscosity ( $1.13 \times 10^{-2} \text{ cm}^2 \text{ s}^{-1}$ ),  $D$  is  $\text{O}_2$  diffusion coefficient ( $1.93 \times 10^{-5} \text{ cm}^2 \text{ s}^{-1}$ ),  $C_{\text{O}_2}$  is dissolved  $\text{O}_2$  concentration in 0.1 M KOH ( $1.2 \times 10^{-3} \text{ mol L}^{-1}$ ), and  $\omega$  is the rotation speed of electrode (rpm).

Electrochemical active surface area (ECSA) value could be calculated from cyclic voltammetry (CV) curve that was recorded with a sweep speed of 50 mV s<sup>-1</sup> in 0.1 M HClO<sub>4</sub> based on following equation:

$$\text{ECSA} = Q / m \times 420$$

Where  $Q$  is the reduced charge gained by integrating the Pd oxide layer, 420  $\mu\text{C cm}^{-2}$  is the reduced charge of the oxide monolayer on the Pd surface, and  $m$  is the Pd loading on the electrode surface.

The mass activity (MA) and specific activity (SA) in this article are calculated at a potential of 0.9 V. The calculation formulas of MA and SA are as follows:

$$\text{MA} = (0.07 \text{ cm}^2 \times j_k) / m_{\text{metal}}$$

$$\text{SA} = (0.07 \text{ cm}^2 \times j_k) / (\text{ECSA} \times m_{\text{metal}})$$

Where  $j_k$  is the kinetic current density at 0.9 V, 0.07 cm<sup>2</sup> is the surface area of the electrode,  $m$  is the metal mass loaded on the glassy carbon electrode.

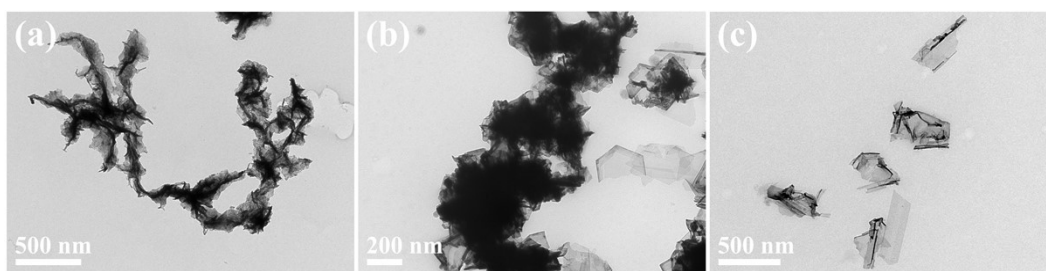

**Fig. S1** TEM images of the samples prepared by replacing  $\text{Mo}(\text{CO})_6$  with (a)  $\text{Fe}_2(\text{CO})_9$ , (b)  $\text{Co}_2(\text{CO})_8$  and (c)  $\text{W}(\text{CO})_6$ , respectively, under the same synthetic conditions.

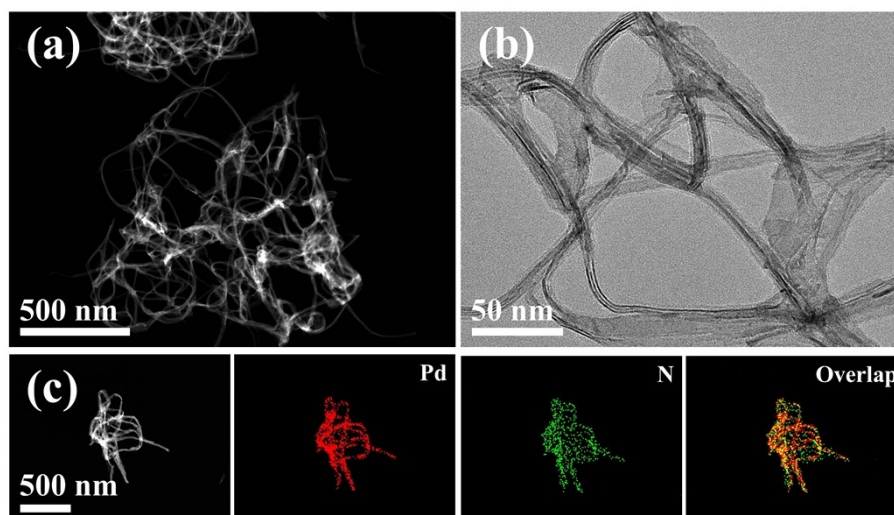

**Fig. S2** (a) HAADF-STEM and (b) TEM images of Pd MNRs. (c) HAADF-STEM image and relevant EDX mapping images of Pd MNRs.

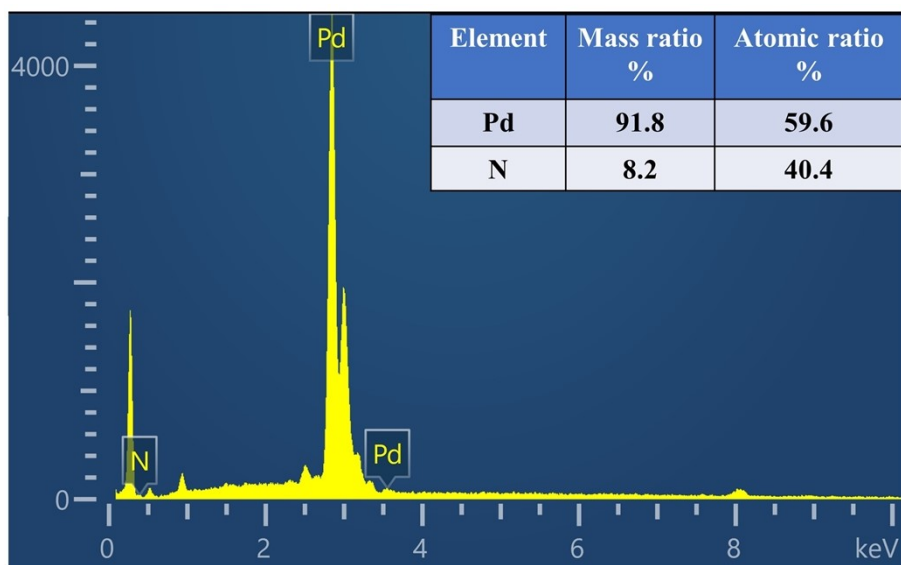

**Fig. S3** EDX spectrum of Pd MNRs.

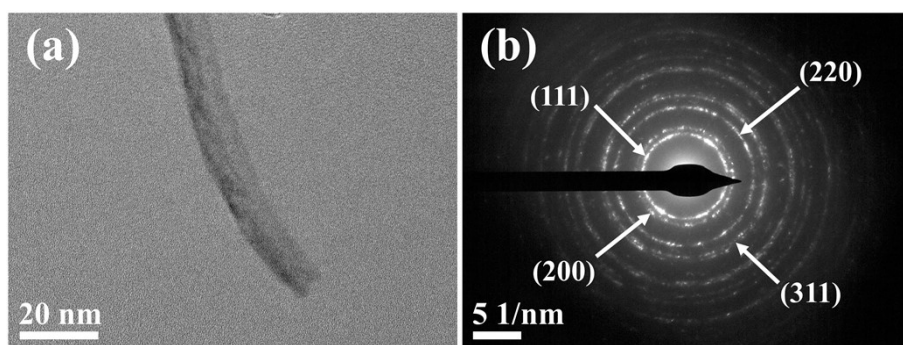

**Fig. S4** (a) TEM image of N-Pd MNRs and (b) corresponding SAED pattern.

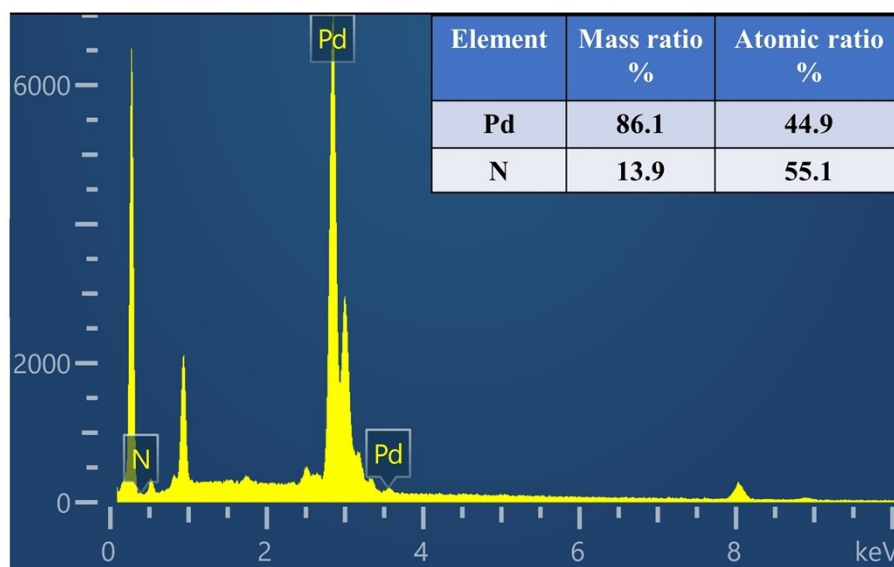

**Fig. S5** EDX spectrum of N-Pd MNRs.

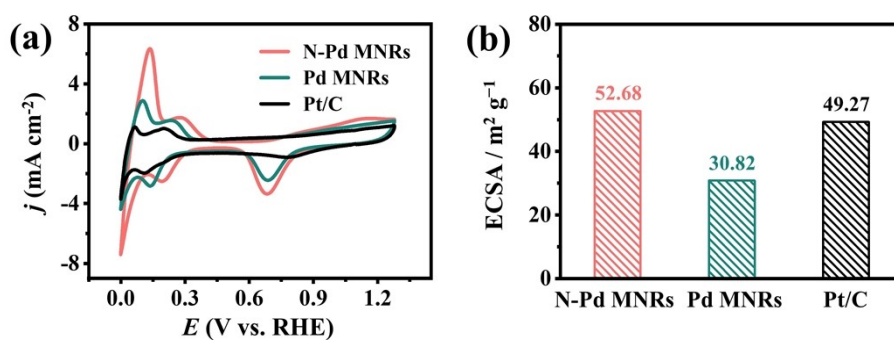

**Fig. S6** (a) CV curves in 0.1 M HClO<sub>4</sub> solution and the corresponding ECSAs (b) of different catalysts.

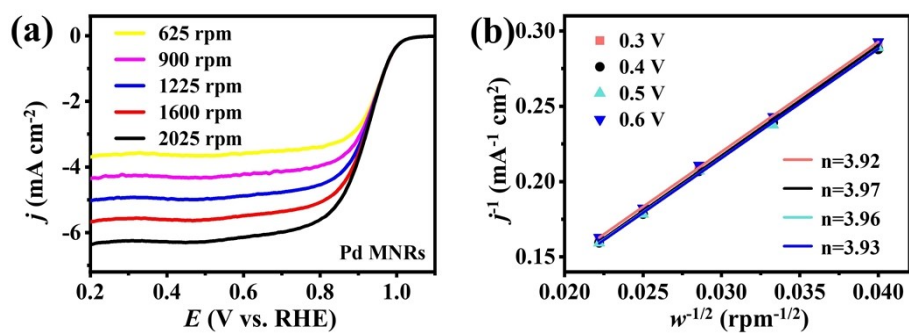

**Fig. S7** (a) ORR polarization curves at different rotating speeds, and (b) electron transfer numbers at different potentials of Pd MNRs.

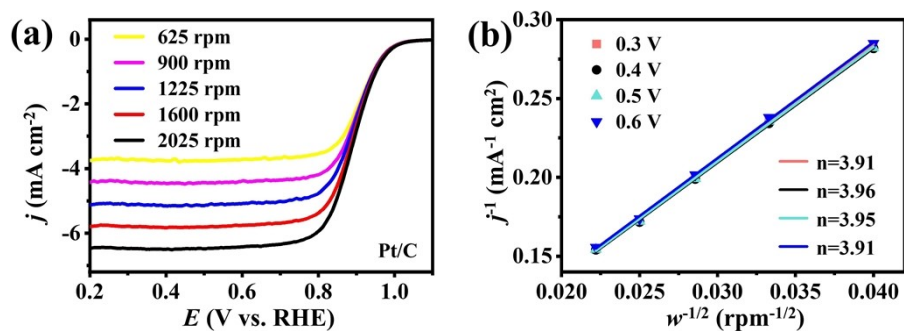

**Fig. S8** (a) ORR polarization curves at different rotating speeds, and (b) electron transfer numbers at different potentials of Pt/C.



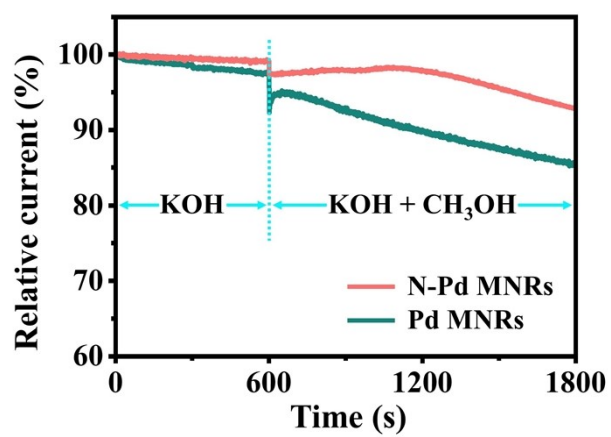

**Fig. S9** Chronoamperometric curves in an O<sub>2</sub>-saturated 0.1 M KOH electrolyte with 3 M CH<sub>3</sub>OH added at around 600 s.

**Table S1** The comparisons of the ORR performance of N-Pd MNRs with some recently reported Pd-based catalysts.

| Catalyst                                            | SA<br>(mA cm <sup>-2</sup> ) | MA<br>(mA μg <sup>-1</sup> metal) | Ref.             |
|-----------------------------------------------------|------------------------------|-----------------------------------|------------------|
| <b>N-Pd MNRs</b>                                    | <b>1.29</b>                  | <b>0.68</b>                       | <b>This work</b> |
| Pd <sub>6</sub> Ni icosahedra                       | 0.66                         | 0.22                              | 2                |
| Pd <sub>3</sub> Pb UPINs/C                          | 1.18                         | 0.59                              | 3                |
| Fe-Pd UPM                                           | 0.225                        | 0.736                             | 4                |
| Pd <sub>9</sub> Pt <sub>1</sub> Ni <sub>1</sub> NSs | 1.22                         | 0.29                              | 5                |
| Pd <sub>3</sub> Pb nanoplates                       | /                            | 0.78                              | 6                |
| Pd@PdFe NPs                                         | 1.56                         | 0.31                              | 7                |
| Au-NWs@Pd@PEI                                       | /                            | 0.29                              | 8                |
| Pt <sub>2</sub> Pd <sub>1</sub>                     | 1.14                         | 0.44                              | 9                |
| Pd <sub>3</sub> Pb/Pd NSs/C                         | 1.31                         | 0.57                              | 10               |
| PtPdSP mNCs                                         | 1.10                         | 0.56                              | 11               |

## References

- 1 B. Ni, Q. Zhang, C. Ouyang, S. Zhang, B. Yu, J. Zhuang, L. Gu and X. Wang, *CCS Chem.*, 2020, **2**, 642-654.
- 2 Y. Feng, Q. Shao, Y. Ji, X. Cui, Y. Li, X. Zhu and X. Huang, *Sci. Adv.*, 2018, **4**, eaap8817.
- 3 J. Guo, L. Gao, X. Tan, Y. Yuan, J. Kim, Y. Wang, H. Wang, Y.-J. Zeng, S.-I. Choi, S. C. Smith and H. Huang, *Angew. Chem., Int. Ed.*, 2021, **60**, 10942-10949.
- 4 S. Huang, S. Lu, S. Gong, Q. Zhang, F. Duan, H. Zhu, H. Gu, W. Dong and M. Du, *ACS Nano*, 2022, **16**, 522-532.
- 5 L. Shi, Q. Wang, Q. Ren, Q. Yang, D. Zhao, Y. Feng, H. Chen and Y. Wang, *Small*, 2022, **18**, e2103665.
- 6 K. Wang, Y. Qin, F. Lv, M. Li, Q. Liu, F. Lin, J. Feng, C. Yang, P. Gao and S. Guo, *Small Methods*, 2018, **2**, 1700331.
- 7 X. Li, X. Li, C. Liu, H. Huang, P. Gao, F. Ahmad, L. Luo, Y. Ye, Z. Geng, G. Wang, R. Si, C. Ma, J. Yang and J. Zeng, *Nano Lett.*, 2020, **20**, 1403-1409.
- 8 Q. Xue, J. Bai, C. Han, P. Chen, J.-X. Jiang and Y. Chen, *ACS Catal.*, 2018, **8**, 11287-11295.
- 9 X. Lyu, W.-N. Zhang, G. Li, B.-W. Shi, Y.-N. Zhang, H. Chen, S.-C. Li and X. Wang, *ACS Appl. Nano Mater.*, 2020, **3**, 8586-8591.
- 10 C. Tang, N. Zhang, Y. Ji, Q. Shao, Y. Li, X. Xiao and X. Huang, *Nano Lett.*, 2019, **19**, 1336-1342.
- 11 S. Yin, Y. Xu, S. Liu, H. Yu, Z. Wang, X. Li, L. Wang and H. Wang, *Nanoscale*, 2020, **12**, 14863-14869.
